# Supplementary material for: Elemental selenium enables enhanced water oxidation electrocatalysis of NiFe layered double hydroxides
Source: Royal Society of Chemistry journal article supplement (doi:10.1039/c9nr06169j), 2019-01-01
Supplement: c9nr06169j1.pdf [file c9nr06169j1.pdf]

## Supporting Information

# Elemental Selenium Enables Enhanced Water Oxidation Electrocatalysis of NiFe Layered Double Hydroxides

Shuo Duan,<sup>a</sup> Shaoqing Chen,<sup>b</sup> Tanyuan Wang,<sup>a,\*</sup> Shenzhou Li,<sup>a</sup> Jianyun Liu,<sup>a</sup> Jiashun Liang,<sup>a</sup> Haiqin Xie,<sup>a</sup> Jiantao Han,<sup>a</sup> Shuhong Jiao,<sup>c</sup> Ruiguo Cao,<sup>c</sup> Hsing-Lin Wang,<sup>b</sup> Qing Li<sup>a,\*</sup>

<sup>a</sup>State Key Laboratory of Material Processing and Die & Mould Technology, School of Materials Science and Engineering, Huazhong University of Science and Technology, Wuhan, Hubei 430074, China

<sup>b</sup>Department of Materials Science and Engineering, Southern University of Science and Technology, Shenzhen, Guangdong 518055, China

<sup>c</sup>Key Laboratory of Materials for Energy Conversion Chinese Academy of Science (CAS), Department of Materials Science and Engineering, University of Science and Technology of China, Hefei 230026, China

\*Corresponding Authors. E-mails: [qing\\_li@hust.edu.cn](mailto:qing_li@hust.edu.cn) (Q. Li); [wangty@hust.edu.cn](mailto:wangty@hust.edu.cn) (T. Wang).

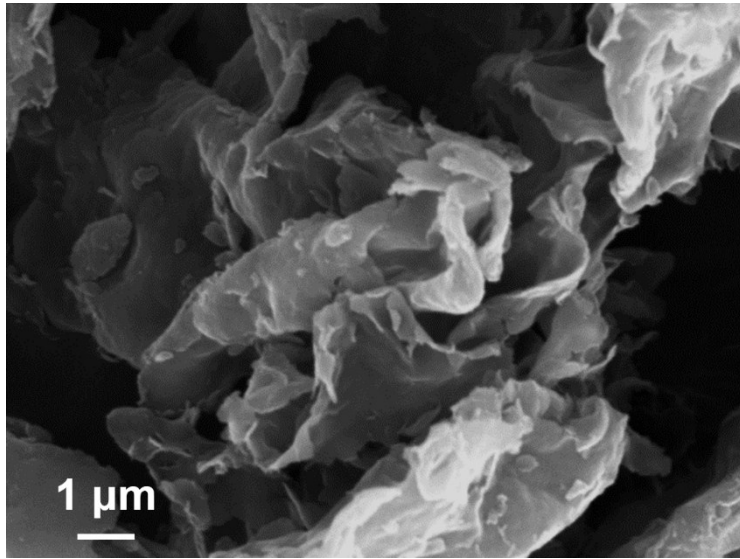

**Figure S1.** SEM image of Ni<sub>0.8</sub>Fe<sub>0.2</sub>-LDH.

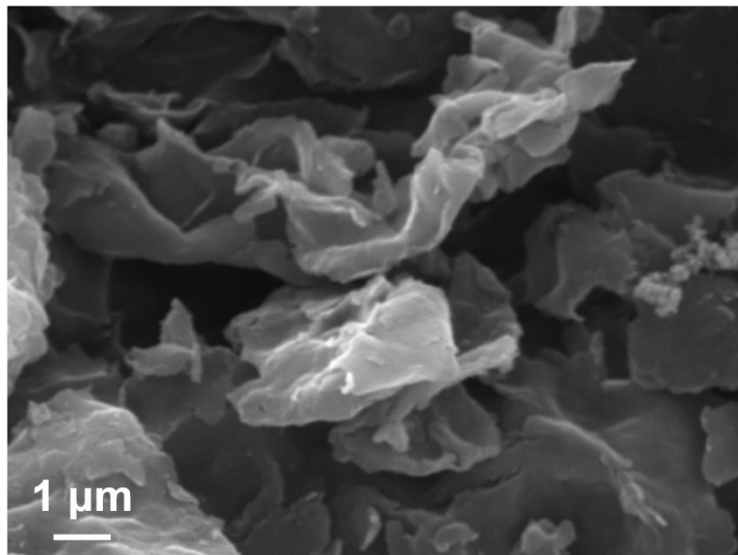

**Figure S2.** SEM image of Ni<sub>0.8</sub>Fe<sub>0.2</sub>-t-Se<sub>0.02</sub>-LDH.

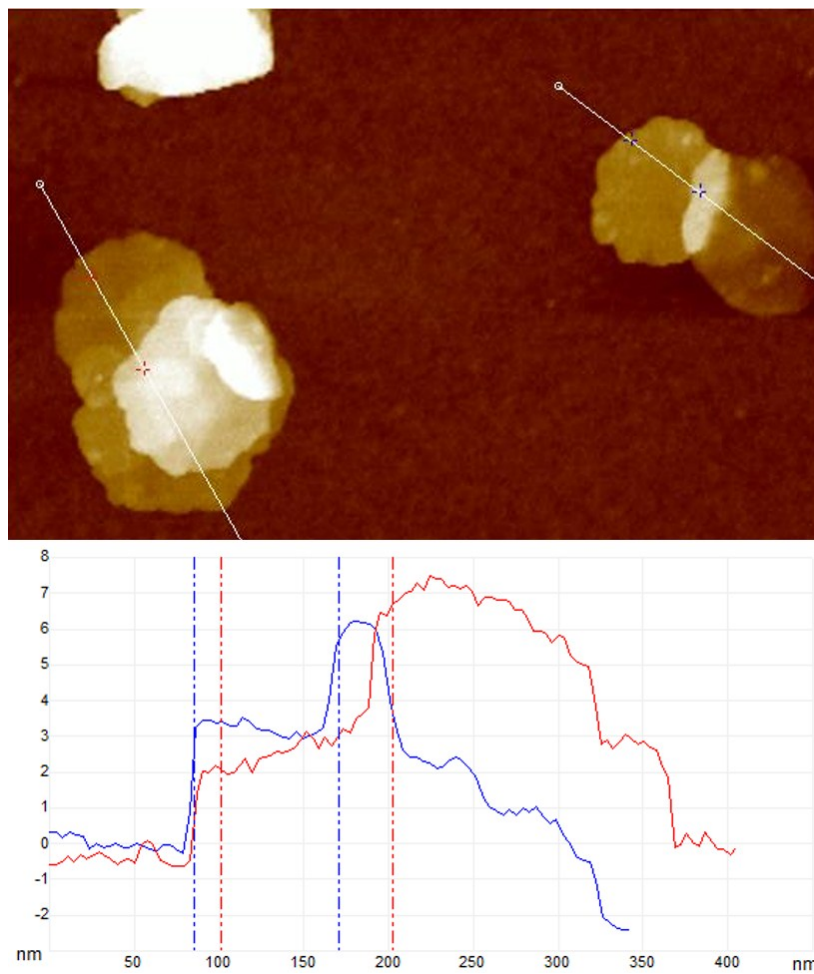

**Figure S3.** AFM image of  $\text{Ni}_{0.8}\text{Fe}_{0.2}\text{-t-Se}_{0.02}\text{-LDH}$ .

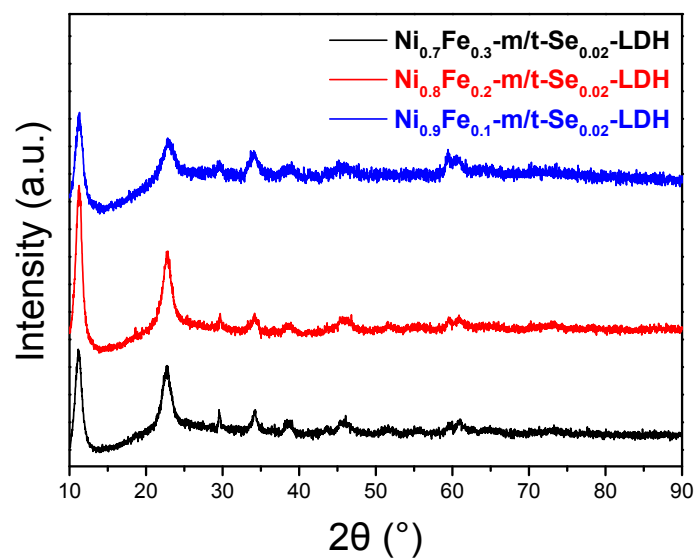

**Figure S4.** XRD patterns of NiFe-m/t-Se-LDH with different Ni/Fe ratios.

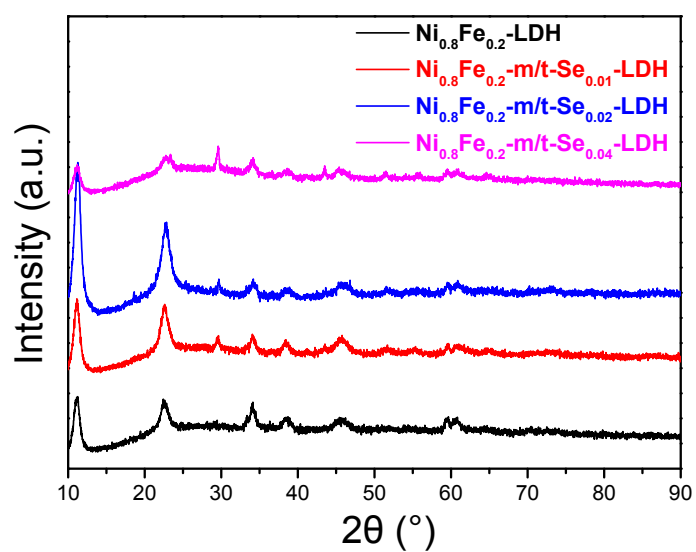

**Figure S5.** XRD patterns of Ni<sub>0.8</sub>Fe<sub>0.2</sub>-m/t-Se-LDH with different doping amounts of m/t-Se.

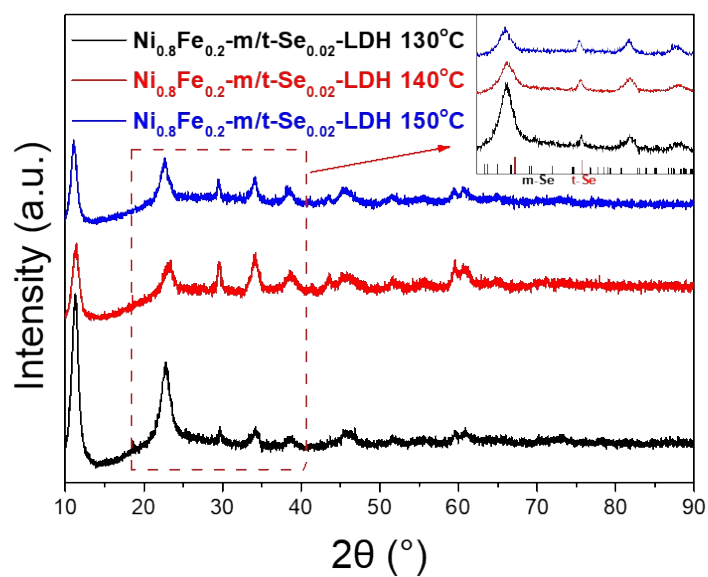

**Figure S6.** XRD patterns of  $\text{Ni}_{0.8}\text{Fe}_{0.2}\text{-m/t-Se}_{0.02}\text{-LDH}$  with different hydrothermal temperatures at 130°C, 140°C and 150°C; insert figure: Partial enlarged XRD patterns of  $\text{Ni}_{0.8}\text{Fe}_{0.2}\text{-m/t-Se}_{0.02}\text{-LDH}$  with different hydrothermal temperatures.

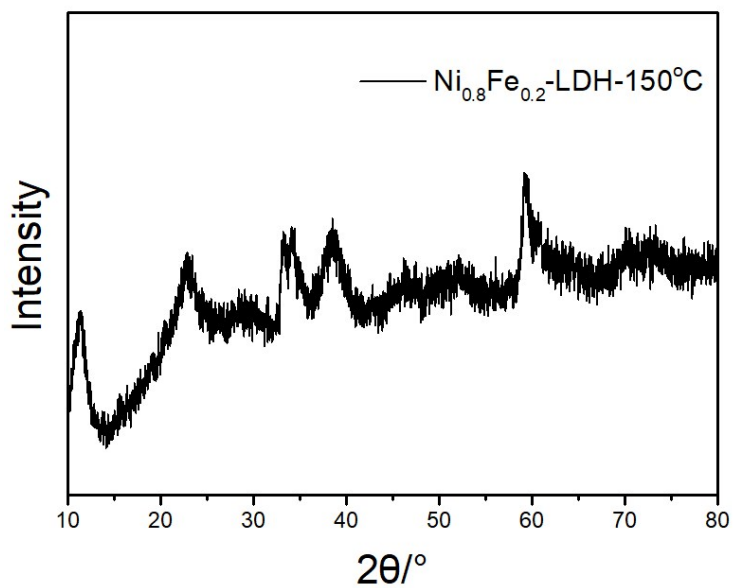

**Figure S7.** XRD pattern of  $\text{Ni}_{0.8}\text{Fe}_{0.2}\text{-LDH}$  with the hydrothermal temperature of 150 °C.

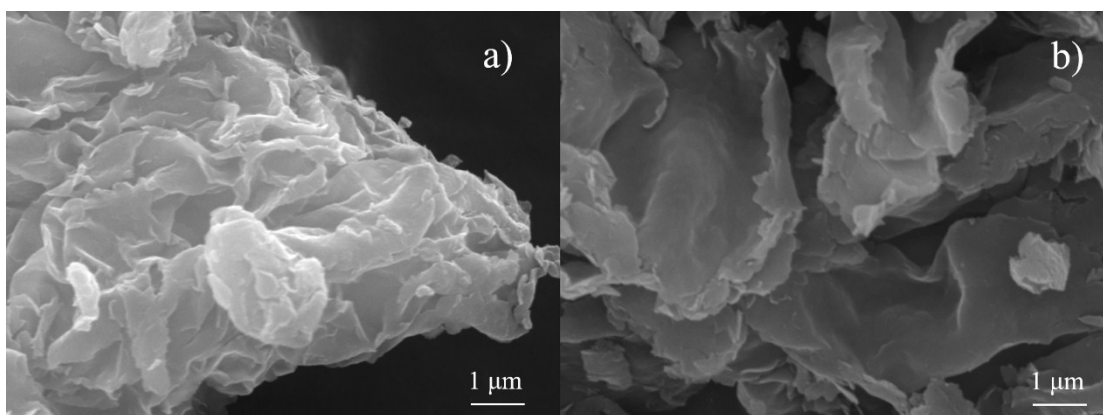

**Figure S8.** SEM images of (a)  $\text{Ni}_{0.8}\text{Fe}_{0.2}\text{-LDH}$  and (b)  $\text{Ni}_{0.8}\text{Fe}_{0.2}\text{-m/t-Se}_{0.02}\text{-LDH}$  with the hydrothermal temperature of 150 °C.

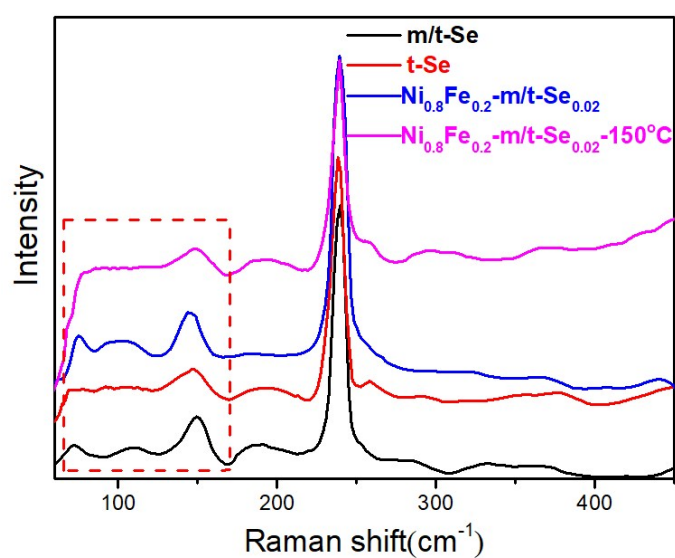

**Figure S9.** Raman spectra of m/t-Se (black line), t-Se (red line),  $\text{Ni}_{0.8}\text{Fe}_{0.2}\text{-m/t-Se}_{0.02}\text{-LDH}$  (blue line) and  $\text{Ni}_{0.8}\text{Fe}_{0.2}\text{-t-Se}_{0.02}\text{-LDH}$  (pink line).

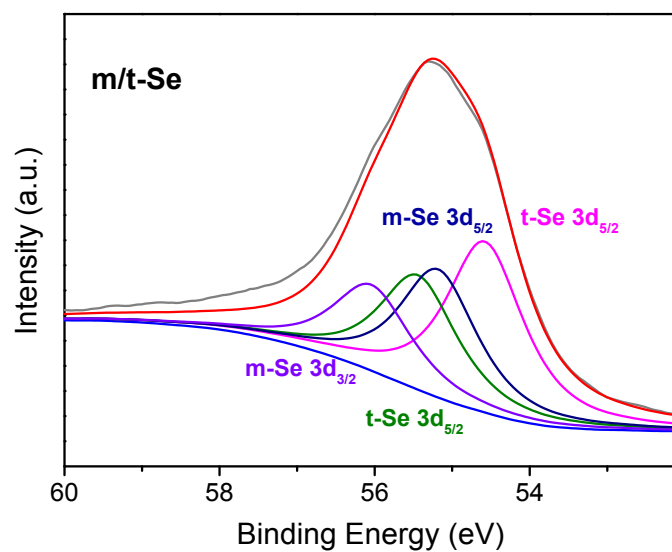

**Figure S10.** High-resolution Se 3d XPS spectrum of m/t-Se.

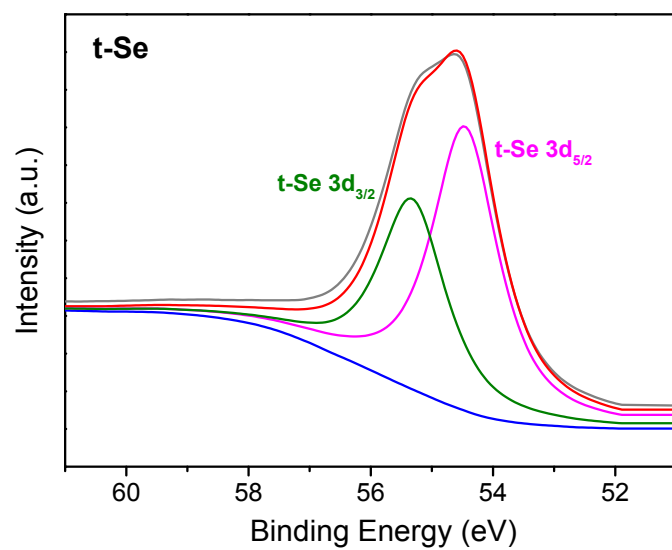

**Figure S11.** High-resolution Se 3d XPS spectrum of t-Se.

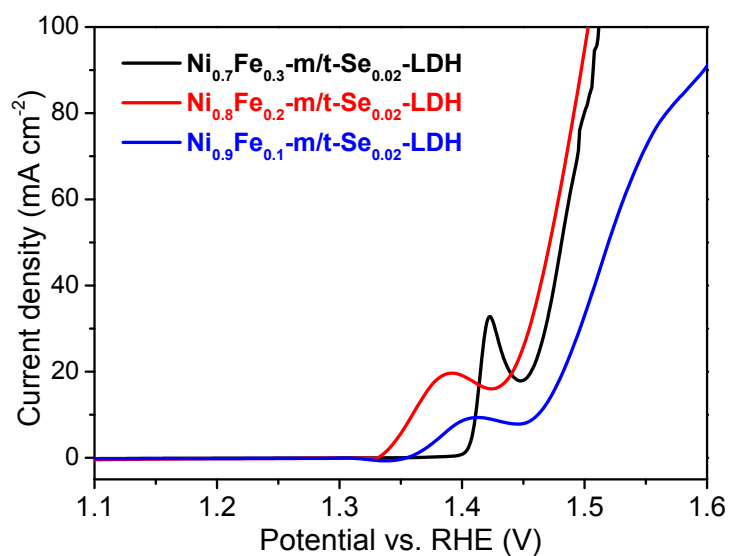

**Figure S12.** OER polarization curves of NiFe-m/t-Se-LDH catalysts with different Ni/Fe ratios.

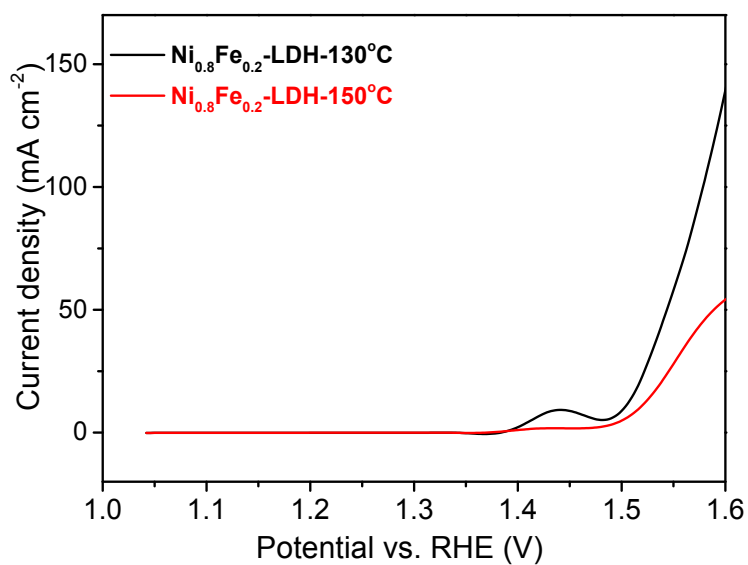

**Figure S13.** OER polarization curves of NiFe-LDH catalysts with different synthesis temperatures.



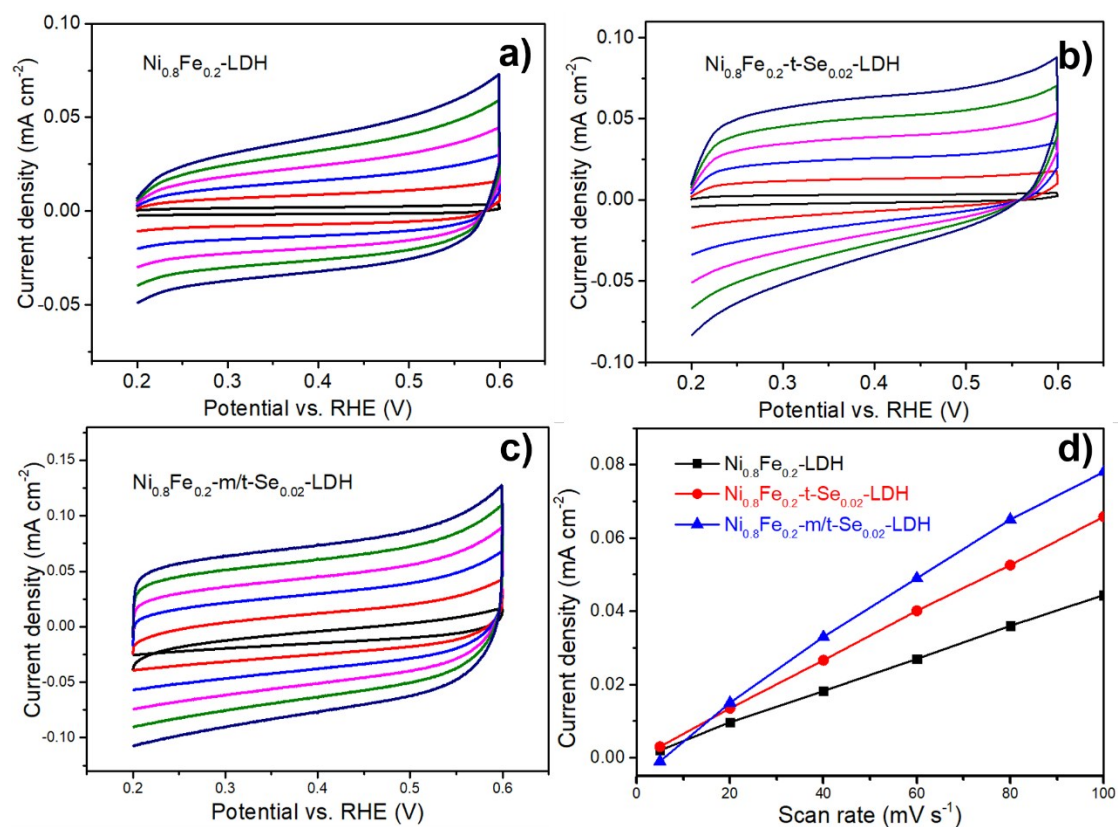

**Figure S14.** Non-Faradaic cyclic voltammograms of (a)  $\text{Ni}_{0.8}\text{Fe}_{0.2}\text{-Se}_{0.02}\text{-LDH}$ , (b)  $\text{Ni}_{0.8}\text{Fe}_{0.2}\text{-m/t-Se}_{0.02}\text{-LDH}$ , and (c)  $\text{Ni}_{0.8}\text{Fe}_{0.2}\text{-m/t-Se}_{0.02}\text{-LDH}$  in 1.0 M KOH electrolyte at scan rate of 5, 20, 40, 60, 80, and 100  $\text{mV/s}$ . (d) Anodic and cathodic current densities at 0.45 V versus the scan rate.

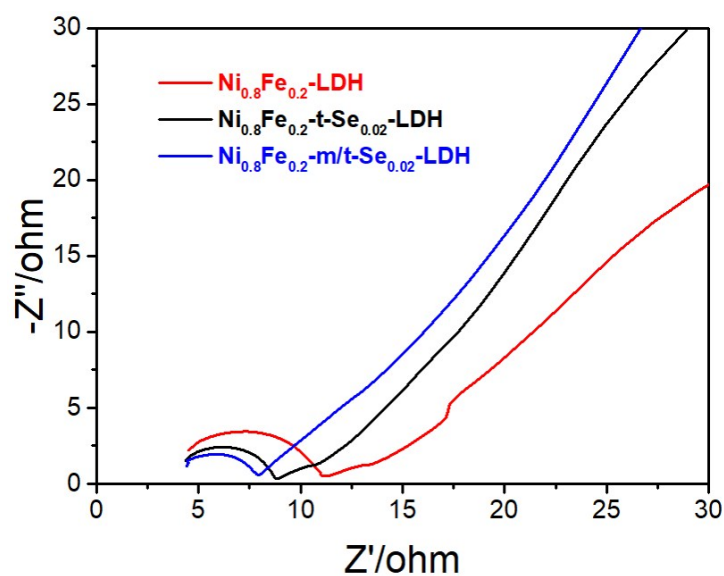

**Figure S15.** EIS plots of  $\text{Ni}_{0.8}\text{Fe}_{0.2}\text{-LDH}$ ,  $\text{Ni}_{0.8}\text{Fe}_{0.2}\text{-t-Se}_{0.02}\text{-LDH}$ , and  $\text{Ni}_{0.8}\text{Fe}_{0.2}\text{-m/t-Se}_{0.02}\text{-LDH}$

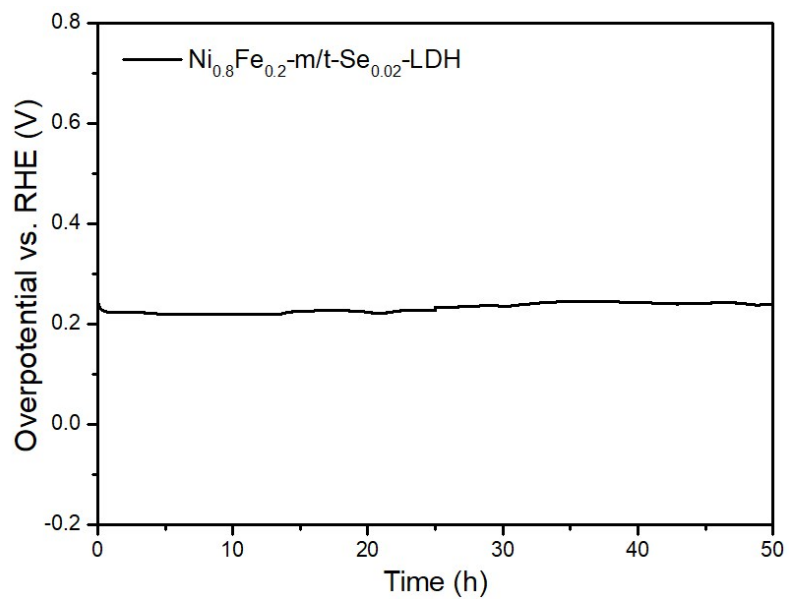

**Figure S16.** Chronopotentiometric curve for Ni<sub>0.8</sub>Fe<sub>0.2</sub>-m/t-Se<sub>0.02</sub>-LDH in 1.0 M KOH electrolyte for 50 h.

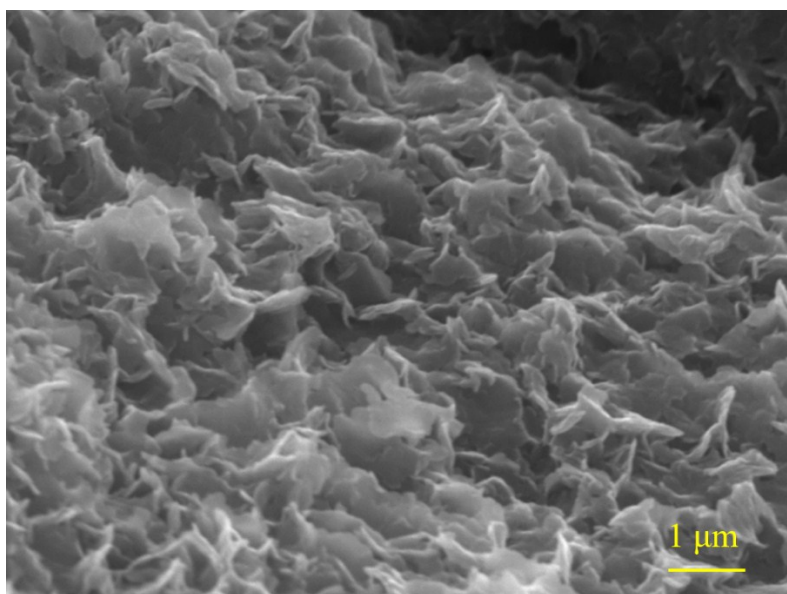

**Figure S17.** SEM image of Ni<sub>0.8</sub>Fe<sub>0.2</sub>-m/t-Se<sub>0.22</sub>-LDH after OER measurement.

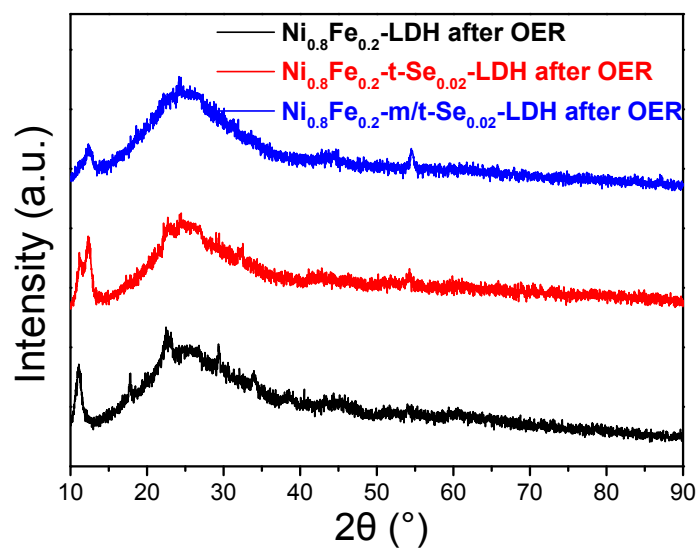

**Figure S18.** XRD patterns of the studied catalysts after OER measurement

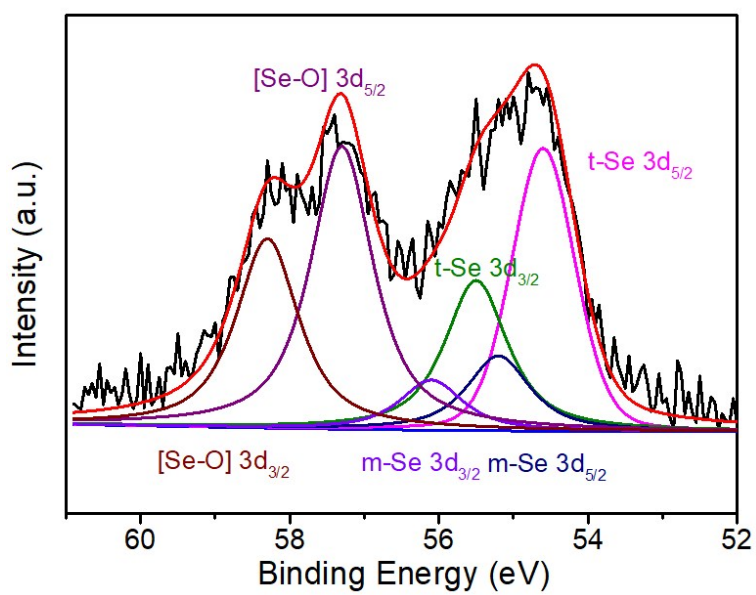

**Figure S19.** High-resolution Se 3d XPS spectrum of  $\text{Ni}_{0.8}\text{Fe}_{0.2}\text{-m/t-Se}_{0.22}\text{-LDH}$  after OER measurement

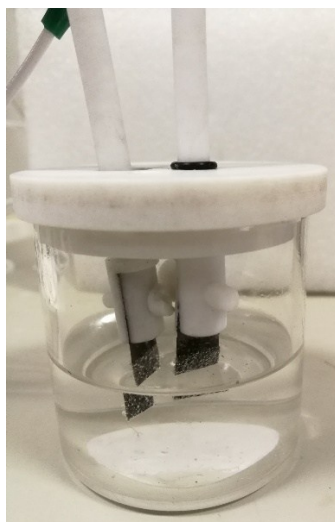

**Figure S20.** The photograph of electrochemical overall water splitting cell ( $\text{Ni}_{0.8}\text{Fe}_{0.2}\text{-m/t-Se}_{0.02}\text{-LDH//Pt/C}$ ).

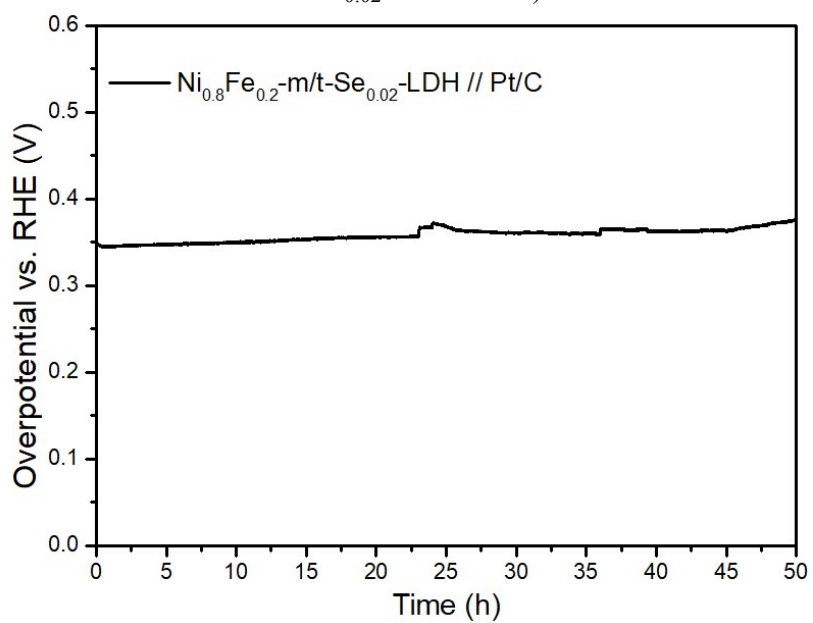

**Figure S21.** Overall water splitting polarization curves of  $\text{Ni}_{0.8}\text{Fe}_{0.2}\text{-m/t-Se}_{0.22}\text{-LDH//Pt}$  in 30 wt% KOH electrolyte for 50 h.

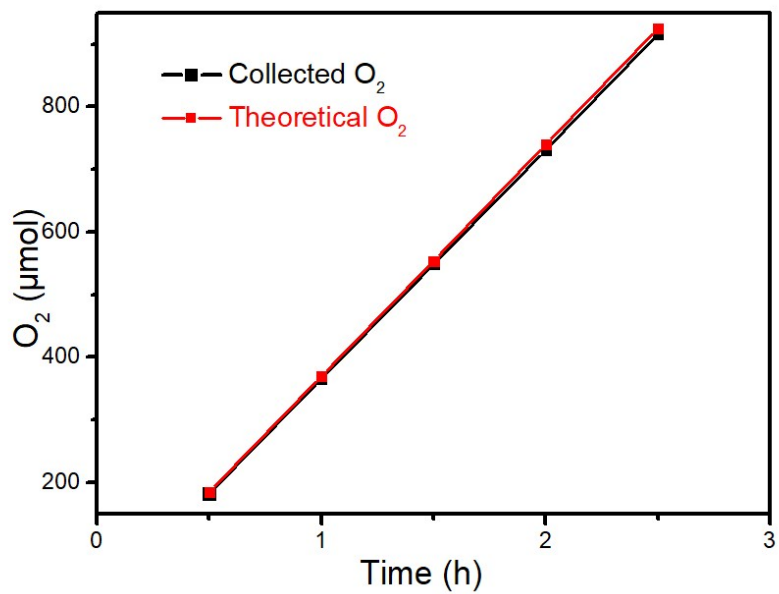

**Figure S22.** The amount of theoretically calculated (red line) and experimentally measured (black line) oxygen versus time for Ni<sub>0.8</sub>Fe<sub>0.2</sub>-m/t-Se<sub>0.22</sub>-LDH in 1.0 M KOH electrolyte.

**Table S1.** Elemental compositions of the studied catalysts before and after OER measurements.

|                                                                                          | Ni    | Fe   | O     | Se   | Fe/Ni ratio |
|------------------------------------------------------------------------------------------|-------|------|-------|------|-------------|
| Ni <sub>0.8</sub> Fe <sub>0.2</sub> <sup>-m/t</sup> Se <sub>0.02</sub> -LDH              | 35.18 | 9.08 | 54.78 | 0.96 | 0.258       |
| Ni <sub>0.8</sub> Fe <sub>0.2</sub> <sup>-t</sup> Se <sub>0.02</sub> -LDH                | 35.26 | 9.23 | 54.56 | 0.95 | 0.262       |
| Ni <sub>0.8</sub> Fe <sub>0.2</sub> -LDH                                                 | 32    | 9.43 | 58.57 | -    | 0.295       |
| Ni <sub>0.8</sub> Fe <sub>0.2</sub> <sup>-m/t</sup> Se <sub>0.02</sub> -LDH after<br>OER | 30.94 | 8.07 | 60.09 | 0.9  | 0.261       |
| Ni <sub>0.8</sub> Fe <sub>0.2</sub> <sup>-t</sup> Se <sub>0.02</sub> -LDH after<br>OER   | 33.04 | 7.89 | 58.16 | 0.91 | 0.239       |
| Ni <sub>0.8</sub> Fe <sub>0.2</sub> -LDH after OER                                       | 33.59 | 3.22 | 63.19 | -    | 0.096       |
